# Supplementary material for: Baseline cerebral structural morphology predict freezing of gait in early drug-naïve Parkinson’s disease
Source: PubMed Central journal article supplement (PMC9800563; doi:10.1038/s41531-022-00442-4), 2022-12-29
Supplement: 41531_2022_442_MOESM1_ESM.pdf [file 41531_2022_442_MOESM1_ESM.pdf]

# 1 **Supplementary Material**

## 2 **Supplementary methods: Construction process of structural** 3 **morphological features**

4 The main pipeline processing steps were described below: i) The native three-  
5 dimensional T<sub>1</sub> images of each subject were corrected for non-uniformity artifacts using  
6 the N3 algorithm; ii) Classification of the grey matter (GM), white matter (WM) and  
7 CSF was performed using the INSECT algorithm; iii) The Constrained Laplacian-based  
8 Anatomic Segmentation with Proximity (CLASP) algorithm was applied to generate a  
9 model of the cortical surface, including 40,962 vertices and 81,920 triangular meshes  
10 per hemisphere; iv) Hemispheric surfaces were generated for both the WM/GM  
11 interface and GM/CSF interface; v) surfaces for each hemisphere were non-linearly  
12 registered to an average surface created from the ICBM152 brain template; vi) A reverse  
13 linear transformation was carried out on each subject's images, and cortical thickness  
14 estimations were calculated at each cortical point in native space using the tlink metric;  
15 vii) Subjects' surface maps, including cortical thickness, surface area, GM surface mean  
16 curvature, were blurred using a 20-millimeter full width at half maximum surface-based  
17 diffusion smoothing kernel; viii) Process voxel-based morphometry (VBM) files to  
18 calculate the GM volumes and WM volumes; ix) Blurring kernel size in 8 mm for  
19 volume; x) Cortical thickness, surface area, surface mean curvature and GM volumes  
20 were calculated at each region according to the Anatomical Automatic Labeling  
21 (AAL)\_90\_1-mm atlas, while WM volumes were calculated at each region according  
22 to the WM John Hopkins University Atlas JHU-ICBM-tracts-maxprob-thr25-1 mm.

23 **Supplementary Figure 1 Differences in surface area between Parkinson's disease**  
24 **(PD) and healthy controls (HCs) and its relationship with the Montreal Cognitive**  
25 **Assessment (MOCA).** (a) The bilateral olfactory cortex (OLF) showed significant  
26 increasing surface area in PD patients than in HC. (b) Only surface area of the left OLF  
27 was correlated with the MOCA. L = left; R = right.

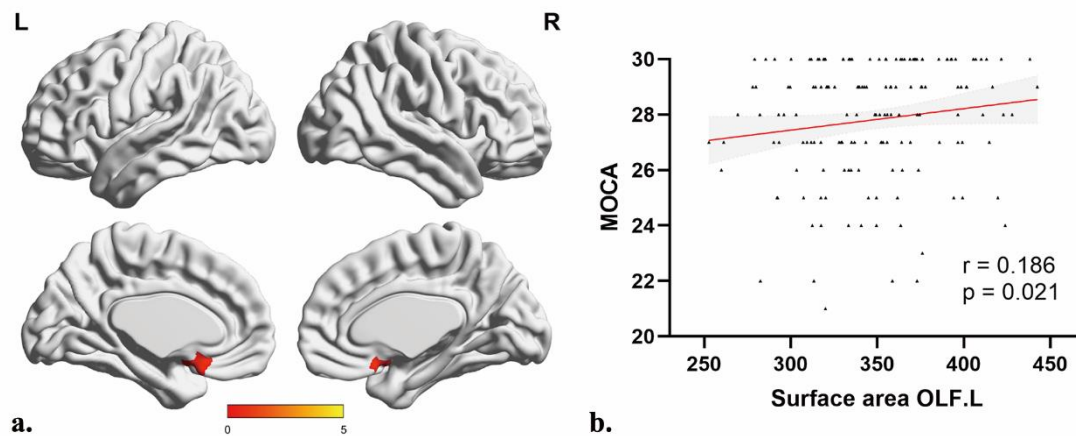

28

29 **Supplementary Table 1: Participants numbers of each center.**

| Center number | HCs | Future NFOG | Future FOG | PD  | Total |
|---------------|-----|-------------|------------|-----|-------|
| 7             | 4   | 11          | 8          | 19  | 23    |
| 12            | 0   | 1           | 2          | 3   | 3     |
| 28            | 5   | 10          | 3          | 13  | 18    |
| 32            | 12  | 11          | 9          | 20  | 32    |
| 73            | 10  | 9           | 4          | 13  | 23    |
| 88            | 9   | 10          | 7          | 17  | 26    |
| 120           | 5   | 13          | 8          | 21  | 26    |
| 196           | 2   | 2           | 1          | 3   | 5     |
| 289           | 7   | 7           | 11         | 18  | 25    |
| 290           | 10  | 13          | 9          | 22  | 32    |
| 291           | 8   | 3           | 2          | 5   | 13    |
| 304           | 1   | 2           | 2          | 4   | 5     |
| Total         | 73  | 92          | 66         | 158 | 231   |

30 HCs = healthy controls; PD = Parkinson's disease; FOG = freezing of gait; NFOG =  
 31 non-freezing of gait.

32

33 **Supplementary Table 2: EV-SVM model performance for different proportions of**  
 34 **future NFOG and FOG in train and test sets.**

| Features | Future NFOG : FOG | AUC  | ACC  | SEN  | SPE  |
|----------|-------------------|------|------|------|------|
| BF       | 4:6               | 0.7  | 0.69 | 0.55 | 0.84 |
|          | 5:5               | 0.67 | 0.66 | 0.59 | 0.78 |
|          | 3:7               | 0.76 | 0.75 | 0.85 | 0.66 |
| SF       | 4:6               | 0.73 | 0.72 | 0.7  | 0.74 |
|          | 5:5               | 0.83 | 0.76 | 0.89 | 0.67 |
|          | 3:7               | 0.86 | 0.79 | 0.77 | 0.81 |

|     |     |      |      |      |      |
|-----|-----|------|------|------|------|
| All | 4:6 | 0.77 | 0.78 | 0.74 | 0.83 |
|     | 5:5 | 0.91 | 0.84 | 0.94 | 0.71 |
|     | 3:7 | 0.91 | 0.84 | 0.90 | 0.83 |

35 FOG = freezing of gait; NFOG = non-freezing of gait; AUC = area under curve; ACC  
36 = accuracy; SEN = sensitivity; SPE = specificity; BF = both clinical and laboratory  
37 features; SF = structural features.

38

39 **Supplementary Table 3: Regions with increased surface area in PD patients.**

| Group   | Region | x   | y   | z  | T-<br>value | Peak<br>voxel<br>p | FDR<br>corrected<br>p | Size<br>(voxel) |
|---------|--------|-----|-----|----|-------------|--------------------|-----------------------|-----------------|
| PD > HC | OLF.L  | 82  | 141 | 61 | 3.536       | 0.039              | 0.05                  | 87              |
|         | OLF.R  | 100 | 142 | 61 | 3.317       | 0.042              | 0.05                  | 81              |

40 PD = Parkinson's disease; HC = healthy controls; FDR = false discovery rate; OLF =  
41 olfactory cortex; L= left; R = right.

42

43 **Supplementary Table 4: Aberrant structural brain regions in patients with future**  
44 **FOG compared with future NFOG at baseline.**

| Group      | Region              | x   | y   | z   | T-<br>value | Peak<br>voxel<br>p | Size<br>(vertex/voxel) |  |
|------------|---------------------|-----|-----|-----|-------------|--------------------|------------------------|--|
|            | Cortical thickness  |     |     |     |             |                    |                        |  |
| NFOG > FOG | PCG.L               | 85  | 83  | 97  | 1.595       | 0.025              | 137                    |  |
|            | Cortical mean curve |     |     |     |             |                    |                        |  |
| NFOG < FOG | ROL.L               | 43  | 118 | 86  | -1.642      | 0.013              | 302                    |  |
|            | INS.L               | 55  | 133 | 75  | -1.949      | 0.002              | 566                    |  |
|            | CUN.R               | 104 | 47  | 100 | -1.231      | 0.012              | 434                    |  |
|            | MOG.R               | 127 | 46  | 91  | -0.241      | 0.009              | 595                    |  |
| NFOG > FOG | SMA.R               | 99  | 126 | 134 | 1.323       | 0.028              | 666                    |  |
|            | Surface area        |     |     |     |             |                    |                        |  |
| NFOG < FOG | SMA.R               | 99  | 126 | 134 | -1.389      | 0.030              | 666                    |  |
|            | SOG.R               | 114 | 45  | 103 | -1.027      | 0.013              | 428                    |  |
|            | PoCG.R              | 131 | 101 | 125 | -0.505      | 0.032              | 1138                   |  |
|            | SPG.L               | 67  | 66  | 131 | -0.032      | 0.027              | 631                    |  |
|            | SPG.R               | 116 | 67  | 134 | -0.128      | 0.014              | 647                    |  |
| NFOG > FOG | MOG.R               | 127 | 46  | 91  | 0.171       | 0.024              | 595                    |  |
|            | PoCG.L              | 48  | 103 | 121 | 0.050       | 0.031              | 1159                   |  |
|            | PCUN.L              | 83  | 70  | 120 | 0.751       | 0.043              | 1079                   |  |
|            | MTG.L               | 34  | 92  | 70  | 0.448       | 0.024              | 1439                   |  |
|            | MTG.R               | 147 | 89  | 71  | 1.209       | 0.008              | 1356                   |  |

|            | Grey matter volume |     |     |     |        |       |     |
|------------|--------------------|-----|-----|-----|--------|-------|-----|
| NFOG < FOG | SMA.R              | 99  | 126 | 134 | -0.943 | 0.039 | 666 |
|            | CUN.R              | 104 | 47  | 100 | -0.339 | 0.015 | 434 |
|            | LING.R             | 106 | 59  | 68  | -0.276 | 0.030 | 678 |
|            | IOG.L              | 54  | 48  | 64  | -2.696 | 0.013 | 268 |
|            | IOG.R              | 128 | 44  | 64  | -2.956 | 0.006 | 314 |
|            | FFG.L              | 59  | 86  | 52  | -1.989 | 0.042 | 687 |

45 \* None of the above structural measurements could be corrected by false discovery  
46 rate (FDR). FOG = freezing of gait; NFOG = non-freezing of gait; L = left; R = right;  
47 PCG = posterior cingulate gyrus; ROL = rolandic operculum; SMA = supplementary  
48 motor area; INS = insula; CUN = cuneus; MOG = middle occipital gyrus; SOG =  
49 superior occipital gyrus; PoCG = postcentral gyrus; SPG = superior parietal gyrus;  
50 PCUN = precuneus; MTG = middle temporal gyrus; LING = lingual gyrus; IOG =  
51 inferior occipital gyrus; FFG = fusiform gyrus.
